# Supplementary material
Source: PubMed Central journal article supplement (PMC137530)
Supplement: pnas_222470799_2.pdf [file pnas_222470799_2.pdf]

| Accession Number                    | Gene description                                                   | U937 / US4.2                  |                   | MPSS     |       |            |              |              |                |                  |                  |
|-------------------------------------|--------------------------------------------------------------------|-------------------------------|-------------------|----------|-------|------------|--------------|--------------|----------------|------------------|------------------|
|                                     |                                                                    | Differential display MEGASORT | MPSS U937 / US4.2 | Northern | Q.PCR | K562 / K56 | BT20 / BT20S | T47D / T47DS | MB231 / MB231S | U937 / U937Siah1 | MCF7 / MCF7Siah1 |
| <b>CHROMATIN STRUCTURE</b>          |                                                                    |                               |                   |          |       |            |              |              |                |                  |                  |
| U26312                              | heterochromatin protein HP1Hsgamma                                 |                               |                   |          |       |            |              |              |                |                  |                  |
| NM_005196                           | centromere protein F (350/400kD, mitotin)                          |                               | 102 23            |          |       |            |              |              |                |                  |                  |
| M21339                              | non-histone chromosomal protein HMG-14                             |                               | 1704 674          |          |       |            |              |              |                |                  |                  |
| AF020043                            | chromosome-associated polypeptide (HCAP)                           |                               |                   |          |       |            |              |              |                |                  |                  |
| NM_006306                           | SMC 1 structural maintenance of chromosomes 1-like 1 (yeast)       |                               | 1214 868          |          |       |            |              |              |                |                  |                  |
| <b>DNA REPLICATION</b>              |                                                                    |                               |                   |          |       |            |              |              |                |                  |                  |
| AF128893                            | telomerase reverse transcriptase                                   |                               | 289 596           |          |       |            |              |              |                |                  |                  |
| AF181897                            | WRN                                                                |                               | 1518 1170         |          |       |            |              |              |                |                  |                  |
| L47276                              | alpha topoisomerase truncated-form                                 |                               |                   |          |       |            |              |              |                |                  |                  |
| <b>DNA REPAIR</b>                   |                                                                    |                               |                   |          |       |            |              |              |                |                  |                  |
| J04718                              | proliferating cell nuclear antigen                                 |                               | 3594 2549         |          |       |            |              |              |                |                  |                  |
| AF165088                            | Rad51                                                              |                               |                   |          |       |            |              |              |                |                  |                  |
| NM_003579                           | homologous to S. cerevisiae RAD54                                  |                               |                   |          |       |            |              |              |                |                  |                  |
| L47234                              | ERCC2                                                              |                               |                   |          |       |            |              |              |                |                  |                  |
| <b>REGULATORS OF TRANSCRIPTION</b>  |                                                                    |                               |                   |          |       |            |              |              |                |                  |                  |
| NM_001675                           | activating transcription factor 4                                  |                               |                   |          |       |            |              |              |                |                  |                  |
| AF161886                            | myeloid zinc finger protein 1 splice variants                      |                               | 866 404           |          |       |            |              |              |                |                  |                  |
| M90357                              | basic transcription factor 3a                                      |                               | 84 77             |          |       |            |              |              |                |                  |                  |
| NM_006406                           | thioredoxin peroxidase (antioxidant enzyme)                        |                               |                   |          |       |            |              |              |                |                  |                  |
| AF060568                            | promyelocytic leukemia zinc finger protein                         |                               | 208 93            |          |       |            |              |              |                |                  |                  |
| NM_003146                           | structure specific recognition protein1                            |                               | 24 0              |          |       |            |              |              |                |                  |                  |
| U29175                              | transcriptional activator (BRG1)                                   |                               |                   |          |       |            |              |              |                |                  |                  |
| M81601                              | transcription elongation factor (SII)                              |                               |                   |          |       |            |              |              |                |                  |                  |
| L11672                              | Kruppel related zinc finger protein (HTF10)                        |                               |                   |          |       |            |              |              |                |                  |                  |
| AF105427                            | transcription factor RFX-B (RFXB)                                  |                               |                   |          |       |            |              |              |                |                  |                  |
| J05448                              | RNA polymerase subunit HRPB 33                                     |                               |                   |          |       |            |              |              |                |                  |                  |
| AF084530                            | cyclin-D binding Myb-like protein                                  |                               | 80 19             |          |       |            |              |              |                |                  |                  |
| AF043431                            | retinoblastoma-interacting protein (RBBP8)                         |                               | 404 229           |          |       |            |              |              |                |                  |                  |
| AB012286                            | 5' region of integrin-beta 4 gene                                  |                               | 3 177             |          |       |            |              |              |                |                  |                  |
| AB022785                            | ASH2L gene, similar to Drosophila ash2 gene                        |                               | 866 404           |          |       |            |              |              |                |                  |                  |
| NM_014938                           | Mix interactor (MONDOA)                                            |                               |                   |          |       |            |              |              |                |                  |                  |
| NM_015928                           | androgen-induced prostate proliferative shutoff associated protein |                               |                   |          |       |            |              |              |                |                  |                  |
| U22376                              | c-myb                                                              |                               | 28 0              |          |       |            |              |              |                |                  |                  |
| AF003530                            | homeobox protein CDX4                                              |                               | 533 314           |          |       |            |              |              |                |                  |                  |
| NM_003035                           | TAL1 (SCL) interrupting locus (SIL)                                |                               | 208 93            |          |       |            |              |              |                |                  |                  |
| NM_005080                           | X-box binding protein 1                                            |                               | 1083 565          |          |       |            |              |              |                |                  |                  |
| <b>RNA TRANSPORT AND PROCESSING</b> |                                                                    |                               |                   |          |       |            |              |              |                |                  |                  |
| U87279                              | splicing factor SRp30c                                             |                               |                   |          |       |            |              |              |                |                  |                  |
| M16342                              | nuclear ribonucleoprotein particle C                               |                               | 1020 356          |          |       |            |              |              |                |                  |                  |
| NM_014280                           | splicing factor similar to dnaJ (SPF31)                            |                               |                   |          |       |            |              |              |                |                  |                  |
| XM_038972                           | splicing factor 3b, subunit 1, 155kD                               |                               |                   |          |       |            |              |              |                |                  |                  |
| M29065                              | hnRNP A2 protein                                                   |                               |                   |          |       |            |              |              |                |                  |                  |
| NM_031243                           | heterogeneous nuclear ribonucleoprotein B1                         |                               |                   |          |       |            |              |              |                |                  |                  |
| NM_002136                           | heterogeneous nuclear ribonucleoprotein A1                         |                               | 1924 1135         |          |       |            |              |              |                |                  |                  |
| NM_004768                           | splicing factor, arginine/serine-rich 11                           |                               | 77 180            |          |       |            |              |              |                |                  |                  |
| NM_002568                           | poly(A)-binding protein, cytoplasmic 1                             |                               | 36 0              |          |       |            |              |              |                |                  |                  |
| NM_032881                           | U7 snRNP-specific Sm-like protein LSM10                            |                               |                   |          |       |            |              |              |                |                  |                  |
| NM_015629                           | pre-mRNA processing factor 31 homolog (yeast)                      |                               |                   |          |       |            |              |              |                |                  |                  |
| NM_006196                           | poly(rC) binding protein 1                                         |                               |                   |          |       |            |              |              |                |                  |                  |
| X70944                              | PTB-associated splicing factor                                     |                               |                   |          |       |            |              |              |                |                  |                  |
| <b>RIBOSOMAL PROTEINS</b>           |                                                                    |                               |                   |          |       |            |              |              |                |                  |                  |
| L20868                              | ribosomal protein L4                                               |                               | 4185 2606         |          |       |            |              |              |                |                  |                  |
| NM_000969                           | ribosomal protein L5                                               |                               | 568 294           |          |       |            |              |              |                |                  |                  |
| NM_000971                           | ribosomal protein L7                                               |                               | 4007 2882         |          |       |            |              |              |                |                  |                  |
| NM_000972                           | ribosomal protein L7a                                              |                               | 4869 3268         |          |       |            |              |              |                |                  |                  |
| NM_000661                           | ribosomal protein L9                                               |                               | 11767 7502        |          |       |            |              |              |                |                  |                  |
| NM_006013                           | ribosomal protein L10                                              |                               | 6316 5377         |          |       |            |              |              |                |                  |                  |
| NM_000975                           | ribosomal protein L11                                              |                               |                   |          |       |            |              |              |                |                  |                  |
| NM_000977                           | ribosomal protein L13                                              |                               | 3396 2253         |          |       |            |              |              |                |                  |                  |
| NM_012423                           | ribosomal protein L13a                                             |                               | 9630 6585         |          |       |            |              |              |                |                  |                  |
| NM_002948                           | ribosomal protein L15                                              |                               | 4381 2457         |          |       |            |              |              |                |                  |                  |
| NM_000980                           | ribosomal protein L18a                                             |                               | 4685 2229         |          |       |            |              |              |                |                  |                  |
| NM_000982                           | ribosomal protein L21                                              |                               |                   |          |       |            |              |              |                |                  |                  |
| NM_000983                           | ribosomal protein L22                                              |                               | 3295 2161         |          |       |            |              |              |                |                  |                  |
| NM_000984                           | ribosomal protein L23a                                             |                               | 5610 4713         |          |       |            |              |              |                |                  |                  |
| L05095                              | ribosomal protein L30                                              |                               | 7561 5398         |          |       |            |              |              |                |                  |                  |
| NM_000994                           | ribosomal protein L32                                              |                               | 6524 3304         |          |       |            |              |              |                |                  |                  |
| NM_007209                           | ribosomal protein L35                                              |                               | 4222 2584         |          |       |            |              |              |                |                  |                  |
| NM_021029                           | ribosomal protein L36a                                             |                               | 38 3              |          |       |            |              |              |                |                  |                  |
| NM_000998                           | ribosomal protein L37a                                             |                               | 6446 4848         |          |       |            |              |              |                |                  |                  |
| NM_001000                           | ribosomal protein L39                                              |                               | 14309 8695        |          |       |            |              |              |                |                  |                  |
| XM_037459                           | ribosomal protein S3A                                              |                               |                   |          |       |            |              |              |                |                  |                  |
| NM_001012                           | ribosomal protein S8                                               |                               | 4234 5299         |          |       |            |              |              |                |                  |                  |

| Accession Number                                                         | Gene description                                             | U937 / US4.2                  |                   | MPSS     |       |            |              |              |                |                  |                  |
|--------------------------------------------------------------------------|--------------------------------------------------------------|-------------------------------|-------------------|----------|-------|------------|--------------|--------------|----------------|------------------|------------------|
|                                                                          |                                                              | Differential display MEGASORT | MPSS U937 / US4.2 | Northern | Q.PCR | K562 / K56 | BT20 / BT20S | T47D / T47DS | MB231 / MB231S | U937 / U937Siah1 | MCF7 / MCF7Siah1 |
| AB061839                                                                 | ribosomal protein S9                                         |                               |                   |          |       |            |              |              |                |                  |                  |
| M13934                                                                   | ribosomal protein S14                                        |                               | 6132 3997         |          |       |            |              |              |                |                  |                  |
| NM_001019                                                                | ribosomal protein S15a                                       |                               | 3516 2973         |          |       |            |              |              |                |                  |                  |
| NM_001021                                                                | ribosomal protein S17                                        |                               | 9261 6572         |          |       |            |              |              |                |                  |                  |
| NM_022551                                                                | ribosomal protein S18                                        |                               | 5671 2820         |          |       |            |              |              |                |                  |                  |
| NM_001022                                                                | ribosomal protein S19                                        |                               | 7492 8673         |          |       |            |              |              |                |                  |                  |
| NM_001023                                                                | ribosomal protein S20                                        |                               | 95 10             |          |       |            |              |              |                |                  |                  |
| U12202                                                                   | ribosomal protein S24                                        |                               |                   |          |       |            |              |              |                |                  |                  |
| U41448                                                                   | ribosomal protein S26                                        |                               | 3181 2481         |          |       |            |              |              |                |                  |                  |
| NM_001031                                                                | ribosomal protein S28                                        |                               | 5671 2820         |          |       |            |              |              |                |                  |                  |
| U14973                                                                   | ribosomal protein S29                                        |                               | 4420 2170         |          |       |            |              |              |                |                  |                  |
| M17885                                                                   | acidic ribosomal phosphoprotein P0                           |                               | 18191 10876       |          |       |            |              |              |                |                  |                  |
| <b>CELL CYCLE</b>                                                        |                                                              |                               |                   |          |       |            |              |              |                |                  |                  |
| M27024                                                                   | heat shock protein (HSP89-alpha)                             |                               | 2963 3488         |          |       |            |              |              |                |                  |                  |
| AF255307                                                                 | cyclin T1                                                    |                               |                   |          |       |            |              |              |                |                  |                  |
| NM_015965                                                                | CGI-39 protein; cell death-regulatory protein GRIM19         |                               | 18191 10876       |          |       |            |              |              |                |                  |                  |
| AF010238                                                                 | von Hippel-Lindau tumor suppressor                           |                               | 363 197           |          |       |            |              |              |                |                  |                  |
| NM_032637                                                                | S-phase kinase-associated protein 2 (SKP2)                   |                               |                   |          |       |            |              |              |                |                  |                  |
| AJ010395                                                                 | DKC1                                                         |                               | 222 40            |          |       |            |              |              |                |                  |                  |
| AB000381                                                                 | GPI-anchored molecule-like protein                           |                               | 64 178            |          |       |            |              |              |                |                  |                  |
| AB002059                                                                 | P2XM                                                         |                               | 45 0              |          |       |            |              |              |                |                  |                  |
| AF117829                                                                 | RICK                                                         |                               |                   |          |       |            |              |              |                |                  |                  |
| <b>PROTEIN SYNTHESIS</b>                                                 |                                                              |                               |                   |          |       |            |              |              |                |                  |                  |
| NM_001412                                                                | translation initiation factor 1A                             |                               | 970 1212          |          |       |            |              |              |                |                  |                  |
| XM_006326                                                                | translation initiation factor 4 gamma2                       |                               |                   |          |       |            |              |              |                |                  |                  |
| NM_003760                                                                | translation initiation factor 4 gamma, 3                     |                               | 97 12             |          |       |            |              |              |                |                  |                  |
| U39067                                                                   | translation initiation factor eIF3 p36 subunit mRNA          |                               |                   |          |       |            |              |              |                |                  |                  |
| M29536                                                                   | translational initiation factor 2beta subunit                |                               |                   |          |       |            |              |              |                |                  |                  |
| NM_005801                                                                | putative translation initiation factor                       |                               | 943 677           |          |       |            |              |              |                |                  |                  |
| U07231                                                                   | G-rich sequence factor-1                                     |                               | 149 47            |          |       |            |              |              |                |                  |                  |
| NM_001404                                                                | translation elongation factor 1 gamma                        |                               | 3250 1909         |          |       |            |              |              |                |                  |                  |
| L41490                                                                   | translation elongation factor 1 alpha 1-like 14              |                               | 19601 8159        |          |       |            |              |              |                |                  |                  |
| NM_001605                                                                | alanyl-tRNA synthetase                                       |                               |                   |          |       |            |              |              |                |                  |                  |
| L29074                                                                   | fragile X mental retardation syndrome protein                |                               | 76 12             |          |       |            |              |              |                |                  |                  |
| <b>PROTEIN FOLDING/MODIFICATION/TURNOVER</b>                             |                                                              |                               |                   |          |       |            |              |              |                |                  |                  |
| BC002594                                                                 | dolichyl-diphosphooligosaccharide-glycosyltransferase        |                               |                   |          |       |            |              |              |                |                  |                  |
| NM_021130                                                                | peptidylprolyl isomerase A (cyclophilin A)                   |                               | 208 93            |          |       |            |              |              |                |                  |                  |
| S82372                                                                   | cyclophilin-A like                                           |                               | 7840 5754         |          |       |            |              |              |                |                  |                  |
| AF054185                                                                 | proteasome subunit HSPC                                      |                               |                   |          |       |            |              |              |                |                  |                  |
| J04809                                                                   | cytosolic adenylate kinase (AK1)                             |                               |                   |          |       |            |              |              |                |                  |                  |
| AJ132637                                                                 | ATP-dependent metalloprotease YME1L                          |                               |                   |          |       |            |              |              |                |                  |                  |
| M35531                                                                   | GDP-L-fucose:beta-D-galactoside 2-alpha-L-fucosyltransferase |                               |                   |          |       |            |              |              |                |                  |                  |
| AF151079                                                                 | HSPC245                                                      |                               |                   |          |       |            |              |              |                |                  |                  |
| AF014398                                                                 | myo-inositol monophosphatase 2                               |                               |                   |          |       |            |              |              |                |                  |                  |
| E10341                                                                   | pro-cathepsin B                                              |                               |                   |          |       |            |              |              |                |                  |                  |
| XM_033922                                                                | ubiquitin specific protease 10                               |                               |                   |          |       |            |              |              |                |                  |                  |
| AF023268                                                                 | ck2 kinase                                                   |                               | 42 0              |          |       |            |              |              |                |                  |                  |
| X95677                                                                   | ArgPIIB protein                                              |                               | 3241 622          |          |       |            |              |              |                |                  |                  |
| <b>CELL SURFACE PROTEINS/CELL ADHESION/EXTRACELLULAR MATRIX PROTEINS</b> |                                                              |                               |                   |          |       |            |              |              |                |                  |                  |
| J03799                                                                   | laminin-binding protein                                      |                               | 4141 1680         |          |       |            |              |              |                |                  |                  |
| AF217411                                                                 | neurologin 3 isoform                                         |                               |                   |          |       |            |              |              |                |                  |                  |
| AF187881                                                                 | leukointegrin alpha d                                        |                               | 60 0              |          |       |            |              |              |                |                  |                  |
| AF166339                                                                 | integrin alpha 6 (ITGA6)                                     |                               | 208 93            |          |       |            |              |              |                |                  |                  |
| AF005963                                                                 | protocadherin 43                                             |                               | 3 147             |          |       |            |              |              |                |                  |                  |
| AF007544                                                                 | prostate-specific membrane antigen                           |                               | 208 93            |          |       |            |              |              |                |                  |                  |
| NM_012072                                                                | complement component 1, q subcomponent, receptor 1           |                               | 0 56              |          |       |            |              |              |                |                  |                  |
| NM_001642                                                                | amyloid beta (A4) precursor-like protein 2                   |                               | 533 314           |          |       |            |              |              |                |                  |                  |
| AF099810                                                                 | neurexin III-alpha                                           |                               | 363 197           |          |       |            |              |              |                |                  |                  |
| NP_443183                                                                | TdT binding protein; similar to synaptotagmin 1              |                               |                   |          |       |            |              |              |                |                  |                  |
| AF247661                                                                 | LDC4                                                         |                               |                   |          |       |            |              |              |                |                  |                  |
| AF184110                                                                 | cyclophilin-related protein (NKTR)                           |                               | 117 6             |          |       |            |              |              |                |                  |                  |
| <b>CYTOSKELETAL PROTEINS</b>                                             |                                                              |                               |                   |          |       |            |              |              |                |                  |                  |
| X04588                                                                   | cytoskeletal tropomyosin                                     |                               | 97 190            |          |       |            |              |              |                |                  |                  |
| NM_002823                                                                | prothymosin, alpha (gene sequence 28)                        |                               | 45 3              |          |       |            |              |              |                |                  |                  |
| AA601082                                                                 | tubulin alpha chain                                          |                               | 14048 8873        |          |       |            |              |              |                |                  |                  |
| NM_002473                                                                | myosin, heavy polypeptide 9, non-muscle                      |                               |                   |          |       |            |              |              |                |                  |                  |
| NM_004986                                                                | kinectin 1 (kinesin receptor)                                |                               | 518 301           |          |       |            |              |              |                |                  |                  |
